# Supplementary material
Source: Elsevier journal article supplement (https://www.sciencedirect.com/science/article/pii/S1575181321000085)
Supplement: mmc1 [file S1575181321000085:mmc1.doc]

Apéndice: **EVALUACIÓN DE HABILIDADES COMUNICACIONALES**

**(Versión en Español de Communication Assessment Tool)**

**NOMBRE DEL ESTUDIANTE MÉDICO ________________________________________________________________**

**La comunicación con los pacientes es una parte muy importante del tratamiento médico de calidad. Nos gustaría saber su opinión sobre la forma en que su estudiante médico se comunicó con usted.**

**Sus respuestas son absolutamente confidenciales, por favor sea lo más abierto y sincero posible.**

| *El estudiante médico…* | **Pobre** | **Aceptable** | **Bueno** | **Muy Bueno** | **Excelente** |
| --- | --- | --- | --- | --- | --- |
| 1. Me saludó de una manera que me hizo sentir cómodo/a | 1 | 2 | 3 | 4 | 5 |
| 2. Me trató con respeto | 1 | 2 | 3 | 4 | 5 |
| 3. Mostró interés en mis ideas sobre mi salud | 1 | 2 | 3 | 4 | 5 |
| 4. Comprendió mis principales preocupaciones sobre mi salud | 1 | 2 | 3 | 4 | 5 |
| 5. Me puso atención (me miró, escuchó cuidadosamente) | 1 | 2 | 3 | 4 | 5 |
| 6. Me dejó hablar sin interrupciones | 1 | 2 | 3 | 4 | 5 |
| 7. Me dio toda la información que yo quería | 1 | 2 | 3 | 4 | 5 |
| 8. Habló en términos que pude entender | 1 | 2 | 3 | 4 | 5 |
| 9. Se aseguró que entendí todo lo que me dijo | 1 | 2 | 3 | 4 | 5 |
| 10. Me animó a hacerle preguntas | 1 | 2 | 3 | 4 | 5 |
| 11. Me incluyó en decisiones hasta donde yo quería participar | 1 | 2 | 3 | 4 | 5 |
| 12. Habló conmigo de los siguientes pasos sobre mi tratamiento, incluso de los planes de seguimiento | 1 | 2 | 3 | 4 | 5 |
| 13. Mostró su interés y preocupación | 1 | 2 | 3 | 4 | 5 |
| 14. Me dedicó la cantidad debida de tiempo | 1 | 2 | 3 | 4 | 5 |

Copyright © 2004/2020 – Gregory Makoul, PhD – All rights reserved – Non-commercial, educational use permitted
